# Supplementary material
Source: publisher site journal article supplement (https://www.dovepress.com/article/297419)
Supplement: Supplementary file 1 [file get_supplementary_file.php]

## Supporting Information

### Molecular and functional characterization of a novel plasmid-borne *bla*<sub>NDM</sub>-like gene, *bla*<sub>AFM-1</sub>, in a clinical strain of *Aeromonas hydrophila*

**Table S1** Primers used for functional detection of the antimicrobial resistance genes in this work

| Genes                       | Primer sequences (5'-3')                                                                       | Restriction endonucleases         | Vectors | Annealing temperature | Amplicon size |
|-----------------------------|------------------------------------------------------------------------------------------------|-----------------------------------|---------|-----------------------|---------------|
| <i>bla</i> <sub>AFM-6</sub> | F <u>GCTCTAGAGAATACGACTCCAT</u><br>CCATGATTCAG<br>R <u>CGGGATCCGATCCTTCC</u><br>AGCTCGTCGCAAAC | <i>Xba</i> I<br><br><i>Bam</i> HI | pUCP24  | 58 °C                 | 950 bp        |
| <i>bla</i> <sub>OXA-1</sub> | F <u>GCTCTAGAAGCCCTTTA</u><br>CCAAACCAATAC<br>R <u>CGGGATCCCGACTTGAT</u><br>TGAAGGGTTGG        | <i>Xba</i> I<br><br><i>Bam</i> HI | pUCP24  | 62 °C                 | 899 bp        |
| <i>aac</i> (6')-Ib10        | F <u>GCTCTAGACATAATTGCT</u><br>CACAGCCAAAC<br>R <u>CGGGATCCTTTAACGGC</u><br>TAACAATTAATGAGG    | <i>Xba</i> I<br><br><i>Bam</i> HI | pUCP20  | 52 °C                 | 1036 bp       |
| <i>aph</i> (3')-Ia          | F <u>GCTCTAGAAGTTTATCAC</u><br>CACCGACTATTTGC<br>R <u>CGGGATCCTGGGTCGAT</u><br>TCCTGGGAGG      | <i>Xba</i> I<br><br><i>Bam</i> HI | pUCP20  | 62 °C                 | 1036 bp       |
| <i>msr</i> (E)              | F <u>GCTCTAGACACCCTGTG</u><br>GATGAATAGC<br>R <u>CGGGATCCGTGCTTCAG</u><br>CAAGTGATTG           | <i>Xba</i> I<br><br><i>Bam</i> HI | pUCP20  | 62 °C                 | 1685 bp       |
| <i>mph</i> (E)              | F <u>GCTCTAGAGGATCGGAG</u><br>CGAATGATATTC<br>R <u>CGGGATCCCAAACAAG</u><br>GCAGTTCTCAG         | <i>Xba</i> I<br><br><i>Bam</i> HI | pUCP20  | 62 °C                 | 1266 bp       |

The underlined sequences represent the restriction endonuclease sites and their protective bases

**Table S2 Antibiotic resistance genes in *Aeromonas hydrophila* SS332 detected using the CARD database**

| Gene ID        | ARO Name                                                           | AMR Gene Family                                                  | Drug Class                                                                                                                                                                                                                                                                                                                                                                                                                            | Resistance Mechanism          | Coverage (%) | Identity (%) |
|----------------|--------------------------------------------------------------------|------------------------------------------------------------------|---------------------------------------------------------------------------------------------------------------------------------------------------------------------------------------------------------------------------------------------------------------------------------------------------------------------------------------------------------------------------------------------------------------------------------------|-------------------------------|--------------|--------------|
| CMCFKOJJ_01136 | catB3                                                              | chloramphenicol acetyltransferase (CAT)                          | phenicol antibiotic                                                                                                                                                                                                                                                                                                                                                                                                                   | antibiotic inactivation       | 100          | 100          |
| CMCFKOJJ_01139 | PER-3                                                              | PER beta-lactamase                                               | penam; penem; carbapenem; cephalosporin; monobactam                                                                                                                                                                                                                                                                                                                                                                                   | antibiotic inactivation       | 100          | 100          |
| CMCFKOJJ_01144 | sul1                                                               | sulfonamide resistant sul                                        | sulfonamide antibiotic                                                                                                                                                                                                                                                                                                                                                                                                                | antibiotic target replacement | 98.92        | 100          |
| CMCFKOJJ_01151 | mphA                                                               | macrolide phosphotransferase (MPH)                               | macrolide antibiotic                                                                                                                                                                                                                                                                                                                                                                                                                  | antibiotic inactivation       | 100          | 100          |
| CMCFKOJJ_03911 | tet(E)                                                             | major facilitator superfamily (MFS) antibiotic efflux pump       | fosfomycin; benzalkonium chloride; tetracycline antibiotic; rhodamine; macrolide antibiotic; cephalosporin; antibacterial free fatty acids; bicyclomycin; nitroimidazole antibiotic; lincosamide antibiotic; peptide antibiotic; acridine dye; diaminopyrimidine antibiotic; oxazolidinone antibiotic; penam; isoniazid; glycylicycline; nucleoside antibiotic; fluoroquinolone antibiotic; phenicol antibiotic; rifamycin antibiotic | antibiotic efflux             | 100          | 99.75        |
| CMCFKOJJ_02190 | MOX-7                                                              | MOX beta-lactamase                                               | penam; cephamycin; cephalosporin                                                                                                                                                                                                                                                                                                                                                                                                      | antibiotic inactivation       | 100          | 96.61        |
| CMCFKOJJ_01133 | aadA16                                                             | ANT(3")                                                          | aminoglycoside antibiotic                                                                                                                                                                                                                                                                                                                                                                                                             | antibiotic inactivation       | 97.86        | 96.36        |
| CMCFKOJJ_04436 | CRP                                                                | resistance-nodulation-cell division (RND) antibiotic efflux pump | tetracycline antibiotic; aminocoumarin antibiotic; macrolide antibiotic; carbapenem; antibacterial free fatty acids; aminoglycoside antibiotic; acridine dye; diaminopyrimidine antibiotic; penam; triclosan; glycylicycline; monobactam; fluoroquinolone antibiotic; phenicol antibiotic                                                                                                                                             | antibiotic efflux             | 100.95       | 89.15        |
| CMCFKOJJ_03510 | OXA-427                                                            | OXA beta-lactamase                                               | penam; cephalosporin                                                                                                                                                                                                                                                                                                                                                                                                                  | antibiotic inactivation       | 100          | 88.26        |
| CMCFKOJJ_01024 | Salmonella enterica gyrA conferring resistance to fluoroquinolones | fluoroquinolone resistant gyrA                                   | fluoroquinolone antibiotic                                                                                                                                                                                                                                                                                                                                                                                                            | antibiotic target alteration  | 102.85       | 75.31        |

|                |                                                                              |                                                                     |                                                                                                                                                                                                                                                                                                                                                                                                                                       |                              |        |       |
|----------------|------------------------------------------------------------------------------|---------------------------------------------------------------------|---------------------------------------------------------------------------------------------------------------------------------------------------------------------------------------------------------------------------------------------------------------------------------------------------------------------------------------------------------------------------------------------------------------------------------------|------------------------------|--------|-------|
| CMCFKOJJ_00402 | ugd                                                                          | pmr phosphoethanolamine transferase                                 | peptide antibiotic                                                                                                                                                                                                                                                                                                                                                                                                                    | antibiotic target alteration | 100    | 71.65 |
| CMCFKOJJ_03289 | bacA                                                                         | undecaprenyl pyrophosphate related proteins                         | peptide antibiotic                                                                                                                                                                                                                                                                                                                                                                                                                    | antibiotic target alteration | 100    | 69.6  |
| CMCFKOJJ_02014 | MCR-7.1                                                                      | MCR phosphoethanolamine transferase                                 | peptide antibiotic                                                                                                                                                                                                                                                                                                                                                                                                                    | antibiotic target alteration | 100.19 | 68.7  |
| CMCFKOJJ_04039 | Escherichia coli parC conferring resistance to fluoroquinolone               | fluoroquinolone self resistant parC; fluoroquinolone resistant parC | fluoroquinolone antibiotic                                                                                                                                                                                                                                                                                                                                                                                                            | antibiotic target alteration | 98.4   | 67.16 |
| CMCFKOJJ_00834 | Mycobacterium tuberculosis katG mutations conferring resistance to isoniazid | isoniazid resistant katG                                            | isoniazid                                                                                                                                                                                                                                                                                                                                                                                                                             | antibiotic target alteration | 96.35  | 63.81 |
| CMCFKOJJ_03492 | YojI                                                                         | ATP-binding cassette (ABC) antibiotic efflux pump                   | penam; pleuromutilin antibiotic; macrolide antibiotic; peptide antibiotic; acridine dye; cephalosporin; tetracycline antibiotic; fluoroquinolone antibiotic; rifamycin antibiotic; nitroimidazole antibiotic                                                                                                                                                                                                                          | antibiotic efflux            | 99.63  | 63.67 |
| CMCFKOJJ_04576 | adeB                                                                         | resistance-nodulation-cell division (RND) antibiotic efflux pump    | penam; triclosan; aminocoumarin antibiotic; macrolide antibiotic; carbapenem; acridine dye; antibacterial free fatty acids; diaminopyrimidine antibiotic; glycylicycline; tetracycline antibiotic; monobactam; fluoroquinolone antibiotic; aminoglycoside antibiotic; phenicol antibiotic                                                                                                                                             | antibiotic efflux            | 97.58  | 62.28 |
| CMCFKOJJ_00516 | msbA                                                                         | ATP-binding cassette (ABC) antibiotic efflux pump                   | penam; pleuromutilin antibiotic; macrolide antibiotic; peptide antibiotic; acridine dye; cephalosporin; tetracycline antibiotic; fluoroquinolone antibiotic; rifamycin antibiotic; nitroimidazole antibiotic                                                                                                                                                                                                                          | antibiotic efflux            | 99.83  | 61.27 |
| CMCFKOJJ_03431 | rosA                                                                         | major facilitator superfamily (MFS) antibiotic efflux pump          | fosfomycin; benzalkonium chloride; tetracycline antibiotic; rhodamine; macrolide antibiotic; cephalosporin; antibacterial free fatty acids; bicyclomycin; nitroimidazole antibiotic; lincosamide antibiotic; peptide antibiotic; acridine dye; diaminopyrimidine antibiotic; oxazolidinone antibiotic; penam; isoniazid; glycylicycline; nucleoside antibiotic; fluoroquinolone antibiotic; phenicol antibiotic; rifamycin antibiotic | antibiotic efflux            | 99.76  | 60.15 |

|                |                                                                                |                                                                                                                              |                                                                                                                                                                                                                                                                                                                                                                                                                                                                                                                                         |                               |        |       |
|----------------|--------------------------------------------------------------------------------|------------------------------------------------------------------------------------------------------------------------------|-----------------------------------------------------------------------------------------------------------------------------------------------------------------------------------------------------------------------------------------------------------------------------------------------------------------------------------------------------------------------------------------------------------------------------------------------------------------------------------------------------------------------------------------|-------------------------------|--------|-------|
| CMCFKOJJ_02738 | FosC2                                                                          | fosC phosphotransferase family                                                                                               | fosfomycin                                                                                                                                                                                                                                                                                                                                                                                                                                                                                                                              | antibiotic inactivation       | 100    | 59.09 |
| CMCFKOJJ_02408 | dfrA3                                                                          | trimethoprim resistant dihydrofolate reductase dfr                                                                           | diaminopyrimidine antibiotic                                                                                                                                                                                                                                                                                                                                                                                                                                                                                                            | antibiotic target replacement | 99.38  | 59.01 |
| CMCFKOJJ_03186 | Staphylococcus aureus fusA with mutation conferring resistance to fusidic acid | antibiotic resistant fusA                                                                                                    | fusidic acid                                                                                                                                                                                                                                                                                                                                                                                                                                                                                                                            | antibiotic target alteration  | 101.01 | 58.86 |
| CMCFKOJJ_02529 | mdtH                                                                           | major facilitator superfamily (MFS) antibiotic efflux pump                                                                   | fosfomycin; benzalkonium chloride; tetracycline antibiotic; rhodamine; macrolide antibiotic; cephalosporin; antibacterial free fatty acids; bicyclomycin; nitroimidazole antibiotic; lincosamide antibiotic; peptide antibiotic; acridine dye; diaminopyrimidine antibiotic; oxazolidinone antibiotic; penam; isoniazid; glycylicline; nucleoside antibiotic; fluoroquinolone antibiotic; phenicol antibiotic; rifamycin antibiotic                                                                                                     | antibiotic efflux             | 97.51  | 57.4  |
| CMCFKOJJ_00823 | H-NS                                                                           | major facilitator superfamily (MFS) antibiotic efflux pump; resistance-nodulation-cell division (RND) antibiotic efflux pump | fosfomycin; benzalkonium chloride; tetracycline antibiotic; rhodamine; aminocoumarin antibiotic; macrolide antibiotic; carbapenem; cephalosporin; antibacterial free fatty acids; bicyclomycin; nitroimidazole antibiotic; aminoglycoside antibiotic; lincosamide antibiotic; peptide antibiotic; acridine dye; diaminopyrimidine antibiotic; oxazolidinone antibiotic; penam; triclosan; isoniazid; cephamycin; glycylicline; nucleoside antibiotic; monobactam; fluoroquinolone antibiotic; rifamycin antibiotic; phenicol antibiotic | antibiotic efflux             | 99.27  | 57.35 |
| CMCFKOJJ_00335 | OprM                                                                           | resistance-nodulation-cell division (RND) antibiotic efflux pump                                                             | sulfonamide antibiotic; penem; tetracycline antibiotic; aminocoumarin antibiotic; cephalosporin; macrolide antibiotic; carbapenem; antibacterial free fatty acids; cephamycin; peptide antibiotic; acridine dye; diaminopyrimidine antibiotic; penam; triclosan; aminoglycoside antibiotic; phenicol antibiotic; glycylicline; monobactam; fluoroquinolone antibiotic                                                                                                                                                                   | antibiotic efflux             | 96.29  | 56.53 |
| CMCFKOJJ_00332 | Escherichia coli acrA                                                          | resistance-nodulation-cell division (RND) antibiotic efflux pump                                                             | tetracycline antibiotic; aminocoumarin antibiotic; macrolide antibiotic; carbapenem; cephalosporin; antibacterial free fatty acids; aminoglycoside antibiotic; acridine dye; diaminopyrimidine antibiotic; penam; triclosan; glycylicline; monobactam; fluoroquinolone antibiotic; phenicol antibiotic; rifamycin antibiotic                                                                                                                                                                                                            | antibiotic efflux             | 97.98  | 55.53 |

|                    |         |                                                                                                                              |                                                                                                                                                                                                                                                                                                                                                                                                                                                                                                                                          |                                                 |        |       |
|--------------------|---------|------------------------------------------------------------------------------------------------------------------------------|------------------------------------------------------------------------------------------------------------------------------------------------------------------------------------------------------------------------------------------------------------------------------------------------------------------------------------------------------------------------------------------------------------------------------------------------------------------------------------------------------------------------------------------|-------------------------------------------------|--------|-------|
| CMCFKOJJ_0017<br>1 | rosB    | major facilitator superfamily (MFS) antibiotic efflux pump                                                                   | fosfomycin; benzalkonium chloride; tetracycline antibiotic; rhodamine; macrolide antibiotic; cephalosporin; antibacterial free fatty acids; bicyclomycin; nitroimidazole antibiotic; lincosamide antibiotic; peptide antibiotic; acridine dye; diaminopyrimidine antibiotic; oxazolidinone antibiotic; penam; isoniazid; glycylyccline; nucleoside antibiotic; fluoroquinolone antibiotic; phenicol antibiotic; rifamycin antibiotic                                                                                                     | antibiotic efflux                               | 97.16  | 54.66 |
| CMCFKOJJ_0024<br>9 | H-NS    | major facilitator superfamily (MFS) antibiotic efflux pump; resistance-nodulation-cell division (RND) antibiotic efflux pump | fosfomycin; benzalkonium chloride; tetracycline antibiotic; rhodamine; aminocoumarin antibiotic; macrolide antibiotic; carbapenem; cephalosporin; antibacterial free fatty acids; bicyclomycin; nitroimidazole antibiotic; aminoglycoside antibiotic; lincosamide antibiotic; peptide antibiotic; acridine dye; diaminopyrimidine antibiotic; oxazolidinone antibiotic; penam; triclosan; isoniazid; cephamycin; glycylyccline; nucleoside antibiotic; monobactam; fluoroquinolone antibiotic; rifamycin antibiotic; phenicol antibiotic | antibiotic efflux                               | 102.19 | 54.29 |
| CMCFKOJJ_0391<br>0 | tetR    | major facilitator superfamily (MFS) antibiotic efflux pump                                                                   | fosfomycin; benzalkonium chloride; tetracycline antibiotic; rhodamine; macrolide antibiotic; cephalosporin; antibacterial free fatty acids; bicyclomycin; nitroimidazole antibiotic; lincosamide antibiotic; peptide antibiotic; acridine dye; diaminopyrimidine antibiotic; oxazolidinone antibiotic; penam; isoniazid; glycylyccline; nucleoside antibiotic; fluoroquinolone antibiotic; phenicol antibiotic; rifamycin antibiotic                                                                                                     | antibiotic target alteration; antibiotic efflux | 96.63  | 51.74 |
| CMCFKOJJ_0256<br>9 | macB    | ATP-binding cassette (ABC) antibiotic efflux pump                                                                            | penam; rifamycin antibiotic; pleuromutilin antibiotic; macrolide antibiotic; peptide antibiotic; acridine dye; cephalosporin; tetracycline antibiotic; fluoroquinolone antibiotic; nitroimidazole antibiotic                                                                                                                                                                                                                                                                                                                             | antibiotic efflux                               | 100.47 | 51.16 |
| CMCFKOJJ_0082<br>4 | tet(35) | ATP-binding cassette (ABC) antibiotic efflux pump                                                                            | penam; pleuromutilin antibiotic; macrolide antibiotic; peptide antibiotic; acridine dye; cephalosporin; tetracycline antibiotic; fluoroquinolone antibiotic; rifamycin antibiotic; nitroimidazole antibiotic                                                                                                                                                                                                                                                                                                                             | antibiotic efflux                               | 94.85  | 50    |
| CMCFKOJJ_0457<br>8 | adeR    | resistance-nodulation-cell division (RND) antibiotic efflux pump                                                             | penam; triclosan; aminocoumarin antibiotic; macrolide antibiotic; carbapenem; acridine dye; antibacterial free fatty acids; diaminopyrimidine antibiotic; glycylyccline; tetracycline antibiotic; monobactam; fluoroquinolone antibiotic; aminoglycoside antibiotic; phenicol antibiotic                                                                                                                                                                                                                                                 | antibiotic efflux                               | 91.9   | 49.78 |

|                    |                                |                                                                                                                                                                                                       |                                                                                                                                                                                                                                                                                                                                                                                                                                                                                                                                                                                              |                   |        |       |
|--------------------|--------------------------------|-------------------------------------------------------------------------------------------------------------------------------------------------------------------------------------------------------|----------------------------------------------------------------------------------------------------------------------------------------------------------------------------------------------------------------------------------------------------------------------------------------------------------------------------------------------------------------------------------------------------------------------------------------------------------------------------------------------------------------------------------------------------------------------------------------------|-------------------|--------|-------|
| CMCFKOJJ_0357<br>7 | Pseudomonas<br>aeruginosa CpxR | resistance-nodulation-<br>cell division (RND)<br>antibiotic efflux pump                                                                                                                               | sulfonamide antibiotic; penem; tetracycline antibiotic; aminocoumarin antibiotic;<br>cephalosporin; macrolide antibiotic; carbapenem; antibacterial free fatty acids;<br>cephamycin; peptide antibiotic; acridine dye; diaminopyrimidine antibiotic; penam;<br>triclosan; aminoglycoside antibiotic; glycylicycline; monobactam; fluoroquinolone antibiotic;<br>phenicol antibiotic                                                                                                                                                                                                          | antibiotic efflux | 101.33 | 49.56 |
| CMCFKOJJ_0402<br>8 | ToIC                           | ATP-binding cassette<br>(ABC) antibiotic efflux<br>pump; major facilitator<br>superfamily (MFS)<br>antibiotic efflux pump;<br>resistance-nodulation-<br>cell division (RND)<br>antibiotic efflux pump | penem; benzalkonium chloride; tetracycline antibiotic; rhodamine; aminocoumarin<br>antibiotic; cephalosporin; macrolide antibiotic; carbapenem; nitroimidazole antibiotic;<br>aminoglycoside antibiotic; lincosamide antibiotic; glycylicycline; bicyclomycin; peptide<br>antibiotic; acridine dye; diaminopyrimidine antibiotic; monobactam; oxazolidinone<br>antibiotic; nucleoside antibiotic; penam; triclosan; antibacterial free fatty acids; rifamycin<br>antibiotic; pleuromutilin antibiotic; isoniazid; fosfomycin; cephamycin; fluoroquinolone<br>antibiotic; phenicol antibiotic | antibiotic efflux | 85.86  | 48.94 |
| CMCFKOJJ_0451<br>8 | H-NS                           | major facilitator<br>superfamily (MFS)<br>antibiotic efflux pump;<br>resistance-nodulation-<br>cell division (RND)<br>antibiotic efflux pump                                                          | fosfomycin; benzalkonium chloride; tetracycline antibiotic; rhodamine; aminocoumarin<br>antibiotic; macrolide antibiotic; carbapenem; cephalosporin; antibacterial free fatty acids;<br>bicyclomycin; nitroimidazole antibiotic; aminoglycoside antibiotic; lincosamide antibiotic;<br>peptide antibiotic; acridine dye; diaminopyrimidine antibiotic; oxazolidinone antibiotic;<br>penam; triclosan; isoniazid; cephamycin; glycylicycline; nucleoside antibiotic; monobactam;<br>fluoroquinolone antibiotic; rifamycin antibiotic; phenicol antibiotic                                     | antibiotic efflux | 100    | 48.17 |
| CMCFKOJJ_0345<br>9 | MexW                           | resistance-nodulation-<br>cell division (RND)<br>antibiotic efflux pump                                                                                                                               | penam; triclosan; aminocoumarin antibiotic; macrolide antibiotic; carbapenem; acridine<br>dye; antibacterial free fatty acids; diaminopyrimidine antibiotic; glycylicycline; tetracycline<br>antibiotic; monobactam; fluoroquinolone antibiotic; aminoglycoside antibiotic; phenicol<br>antibiotic                                                                                                                                                                                                                                                                                           | antibiotic efflux | 99.41  | 48.12 |
| CMCFKOJJ_0387<br>8 | H-NS                           | major facilitator<br>superfamily (MFS)<br>antibiotic efflux pump;<br>resistance-nodulation-<br>cell division (RND)<br>antibiotic efflux pump                                                          | fosfomycin; benzalkonium chloride; tetracycline antibiotic; rhodamine; aminocoumarin<br>antibiotic; macrolide antibiotic; carbapenem; cephalosporin; antibacterial free fatty acids;<br>bicyclomycin; nitroimidazole antibiotic; aminoglycoside antibiotic; lincosamide antibiotic;<br>peptide antibiotic; acridine dye; diaminopyrimidine antibiotic; oxazolidinone antibiotic;<br>penam; triclosan; isoniazid; cephamycin; glycylicycline; nucleoside antibiotic; monobactam;<br>fluoroquinolone antibiotic; rifamycin antibiotic; phenicol antibiotic                                     | antibiotic efflux | 91.24  | 48    |
| CMCFKOJJ_0025<br>3 | macB                           | ATP-binding cassette<br>(ABC) antibiotic efflux<br>pump                                                                                                                                               | penam; rifamycin antibiotic; pleuromutilin antibiotic; macrolide antibiotic; peptide antibiotic;<br>acridine dye; cephalosporin; tetracycline antibiotic; fluoroquinolone antibiotic;<br>nitroimidazole antibiotic                                                                                                                                                                                                                                                                                                                                                                           | antibiotic efflux | 103.88 | 47.38 |

|                    |                            |                                                                  |                                                                                                                                                                                                                                                                                                                                                                                                                                                                  |                               |       |       |
|--------------------|----------------------------|------------------------------------------------------------------|------------------------------------------------------------------------------------------------------------------------------------------------------------------------------------------------------------------------------------------------------------------------------------------------------------------------------------------------------------------------------------------------------------------------------------------------------------------|-------------------------------|-------|-------|
| CMCFKOJJ_0133<br>1 | hmrM                       | multidrug and toxic compound extrusion (MATE) transporter        | acridine dye; glycylicycline; tetracycline antibiotic; fluoroquinolone antibiotic                                                                                                                                                                                                                                                                                                                                                                                | antibiotic efflux             | 95.26 | 47.06 |
| CMCFKOJJ_0346<br>6 | kdpE                       | kdpDE                                                            | aminoglycoside antibiotic                                                                                                                                                                                                                                                                                                                                                                                                                                        | antibiotic efflux             | 100   | 46.22 |
| CMCFKOJJ_0457<br>7 | adeA                       | resistance-nodulation-cell division (RND) antibiotic efflux pump | penam; triclosan; aminocoumarin antibiotic; macrolide antibiotic; carbapenem; acridine dye; antibacterial free fatty acids; diaminopyrimidine antibiotic; glycylicycline; tetracycline antibiotic; monobactam; fluoroquinolone antibiotic; aminoglycoside antibiotic; phenicol antibiotic                                                                                                                                                                        | antibiotic efflux             | 93.18 | 46.07 |
| CMCFKOJJ_0112<br>8 | adeG                       | resistance-nodulation-cell division (RND) antibiotic efflux pump | penam; triclosan; aminocoumarin antibiotic; macrolide antibiotic; carbapenem; acridine dye; antibacterial free fatty acids; diaminopyrimidine antibiotic; glycylicycline; tetracycline antibiotic; monobactam; fluoroquinolone antibiotic; aminoglycoside antibiotic; phenicol antibiotic                                                                                                                                                                        | antibiotic efflux             | 88.67 | 45.56 |
| CMCFKOJJ_0351<br>2 | smeR                       | resistance-nodulation-cell division (RND) antibiotic efflux pump | penam; triclosan; aminocoumarin antibiotic; macrolide antibiotic; carbapenem; acridine dye; cephalosporin; antibacterial free fatty acids; diaminopyrimidine antibiotic; glycylicycline; cephamycin; tetracycline antibiotic; monobactam; fluoroquinolone antibiotic; aminoglycoside antibiotic; phenicol antibiotic                                                                                                                                             | antibiotic efflux             | 95.2  | 44.49 |
| CMCFKOJJ_0375<br>2 | QnrB46                     | quinolone resistance protein (qnr)                               | fluoroquinolone antibiotic                                                                                                                                                                                                                                                                                                                                                                                                                                       | antibiotic target protection  | 91.59 | 44.44 |
| CMCFKOJJ_0431<br>9 | Klebsiella pneumoniae KpnF | major facilitator superfamily (MFS) antibiotic efflux pump       | fosfomycin; benzalkonium chloride; tetracycline antibiotic; rhodamine; antibacterial free fatty acids; macrolide antibiotic; cephalosporin; bicyclomycin; nitroimidazole antibiotic; lincosamide antibiotic; peptide antibiotic; acridine dye; diaminopyrimidine antibiotic; oxazolidinone antibiotic; penam; aminoglycoside antibiotic; isoniazid; glycylicycline; nucleoside antibiotic; fluoroquinolone antibiotic; rifamycin antibiotic; phenicol antibiotic | antibiotic efflux             | 88.99 | 44.33 |
| CMCFKOJJ_0234<br>6 | sul4                       | sulfonamide resistant sul                                        | sulfonamide antibiotic                                                                                                                                                                                                                                                                                                                                                                                                                                           | antibiotic target replacement | 93.38 | 44.03 |
| CMCFKOJJ_0111<br>0 | bcr-1                      | major facilitator superfamily (MFS) antibiotic efflux pump       | fosfomycin; benzalkonium chloride; tetracycline antibiotic; rhodamine; macrolide antibiotic; cephalosporin; antibacterial free fatty acids; bicyclomycin; nitroimidazole antibiotic; lincosamide antibiotic; peptide antibiotic; acridine dye; diaminopyrimidine antibiotic; oxazolidinone antibiotic; penam; isoniazid; glycylicycline; nucleoside antibiotic; fluoroquinolone antibiotic; phenicol antibiotic; rifamycin antibiotic                            | antibiotic efflux             | 91.29 | 43.32 |

|                    |                                                                                |                                                                  |                                                                                                                                                                                                                                                                                                                                                                                                                                     |                              |        |       |
|--------------------|--------------------------------------------------------------------------------|------------------------------------------------------------------|-------------------------------------------------------------------------------------------------------------------------------------------------------------------------------------------------------------------------------------------------------------------------------------------------------------------------------------------------------------------------------------------------------------------------------------|------------------------------|--------|-------|
| CMCFKOJJ_0168<br>7 | bcr-1                                                                          | major facilitator superfamily (MFS) antibiotic efflux pump       | fosfomycin; benzalkonium chloride; tetracycline antibiotic; rhodamine; macrolide antibiotic; cephalosporin; antibacterial free fatty acids; bicyclomycin; nitroimidazole antibiotic; lincosamide antibiotic; peptide antibiotic; acridine dye; diaminopyrimidine antibiotic; oxazolidinone antibiotic; penam; isoniazid; glycylicline; nucleoside antibiotic; fluoroquinolone antibiotic; phenicol antibiotic; rifamycin antibiotic | antibiotic efflux            | 91.29  | 43.05 |
| CMCFKOJJ_0347<br>5 | Streptomyces rishiriensis parY mutant conferring resistance to aminocoumarin   | aminocoumarin self resistant parY; aminocoumarin resistant parY  | aminocoumarin antibiotic                                                                                                                                                                                                                                                                                                                                                                                                            | antibiotic target alteration | 95.45  | 42.48 |
| CMCFKOJJ_0380<br>2 | Staphylococcus aureus fusE with mutation conferring resistance to fusidic acid | antibiotic resistant fusE                                        | fusidic acid                                                                                                                                                                                                                                                                                                                                                                                                                        | antibiotic target alteration | 98.31  | 42.29 |
| CMCFKOJJ_0256<br>7 | Pseudomonas aeruginosa CpxR                                                    | resistance-nodulation-cell division (RND) antibiotic efflux pump | sulfonamide antibiotic; penem; tetracycline antibiotic; aminocoumarin antibiotic; cephalosporin; macrolide antibiotic; carbapenem; antibacterial free fatty acids; cephamycin; peptide antibiotic; acridine dye; diaminopyrimidine antibiotic; penam; triclosan; aminoglycoside antibiotic; glycylicline; monobactam; fluoroquinolone antibiotic; phenicol antibiotic                                                               | antibiotic efflux            | 99.11  | 42.15 |
| CMCFKOJJ_0364<br>9 | Pseudomonas aeruginosa CpxR                                                    | resistance-nodulation-cell division (RND) antibiotic efflux pump | sulfonamide antibiotic; penem; tetracycline antibiotic; aminocoumarin antibiotic; cephalosporin; macrolide antibiotic; carbapenem; antibacterial free fatty acids; cephamycin; peptide antibiotic; acridine dye; diaminopyrimidine antibiotic; penam; triclosan; aminoglycoside antibiotic; glycylicline; monobactam; fluoroquinolone antibiotic; phenicol antibiotic                                                               | antibiotic efflux            | 100.89 | 40.09 |



**Table S3 Antibiotic resistance genes in pSS332-218k of *Aeromonas hydrophila* SS332 detected using the CARD database**

| Gene ID        | Cutoff  | ARO Name    | AMR Gene Family                               | Drug Class                                                                                                                                                               | Drug Class                    | Resistance Mechanism                                    | Coverage (%) | Identity (%) |
|----------------|---------|-------------|-----------------------------------------------|--------------------------------------------------------------------------------------------------------------------------------------------------------------------------|-------------------------------|---------------------------------------------------------|--------------|--------------|
| IBDFPOCI_00066 | Perfect | msrE        | ABC-F type ribosomal protection protein MsrE  | pleuromutilin antibiotic; macrolide antibiotic; oxazolidinone antibiotic; tetracycline antibiotic; streptogramin antibiotic; phenicol antibiotic; lincosamide antibiotic | antibiotic target protection  | ABC-F ATP-binding cassette ribosomal protection protein | 100          | 100          |
| IBDFPOCI_00067 | Perfect | mphE        |                                               | macrolide antibiotic                                                                                                                                                     | antibiotic inactivation       | macrolide phosphotransferase (MPH)                      | 100          | 100          |
| IBDFPOCI_00083 | Strict  | AAC(6')-Ib7 | Aminoglycoside N(6')-acetyltransferase type 1 | aminoglycoside antibiotic                                                                                                                                                | antibiotic inactivation       | AAC(6')                                                 | 75.86        | 98.99        |
| IBDFPOCI_00084 | Strict  | OXA-1       | Beta-lactamase OXA-1                          | penam; cephalosporin                                                                                                                                                     | antibiotic inactivation       | OXA beta-lactamase                                      | 71.38        | 100          |
| IBDFPOCI_00085 | Strict  | catB3       | Chloramphenicol acetyltransferase             | phenicol antibiotic                                                                                                                                                      | antibiotic inactivation       | chloramphenicol acetyltransferase (CAT)                 | 51.43        | 99.07        |
| IBDFPOCI_00086 | Strict  | catB3       | Chloramphenicol acetyltransferase             | phenicol antibiotic                                                                                                                                                      | antibiotic inactivation       | chloramphenicol acetyltransferase (CAT)                 | 40.48        | 100          |
| IBDFPOCI_00088 | Strict  | APH(3')-Ia  | Aminoglycoside 3'-phosphotransferase          | aminoglycoside antibiotic                                                                                                                                                | antibiotic inactivation       | APH(3')                                                 | 100          | 98.52        |
| IBDFPOCI_00093 | Strict  | sul1        | Dihydropteroate synthase                      | sulfonamide antibiotic                                                                                                                                                   | antibiotic target replacement | sulfonamide resistant sul                               | 37.63        | 99.05        |
| IBDFPOCI_00102 | Strict  | BRP(MBL)    | Bleomycin resistance protein                  | glycopeptide antibiotic                                                                                                                                                  | antibiotic inactivation       | Bleomycin resistant protein                             | 100          | 97.52        |
| IBDFPOCI_00103 | Loose   | NDM-6       | Metallo-beta-lactamase type 2                 | penam; carbapenem; cephalosporin; cephamicin                                                                                                                             | antibiotic inactivation       | NDM beta-lactamase                                      | 96.67        | 86.21        |
| IBDFPOCI_00106 | Strict  | sul1        | Dihydropteroate synthase                      | sulfonamide antibiotic                                                                                                                                                   | antibiotic target replacement | sulfonamide resistant sul                               | 100.72       | 95.37        |
| IBDFPOCI_00108 | Strict  | dfrA5       | Dihydrofolate reductase type 1                | diaminopyrimidine antibiotic                                                                                                                                             | antibiotic target replacement | trimethoprim resistant dihydrofolate reductase dfr      | 96.82        | 100          |

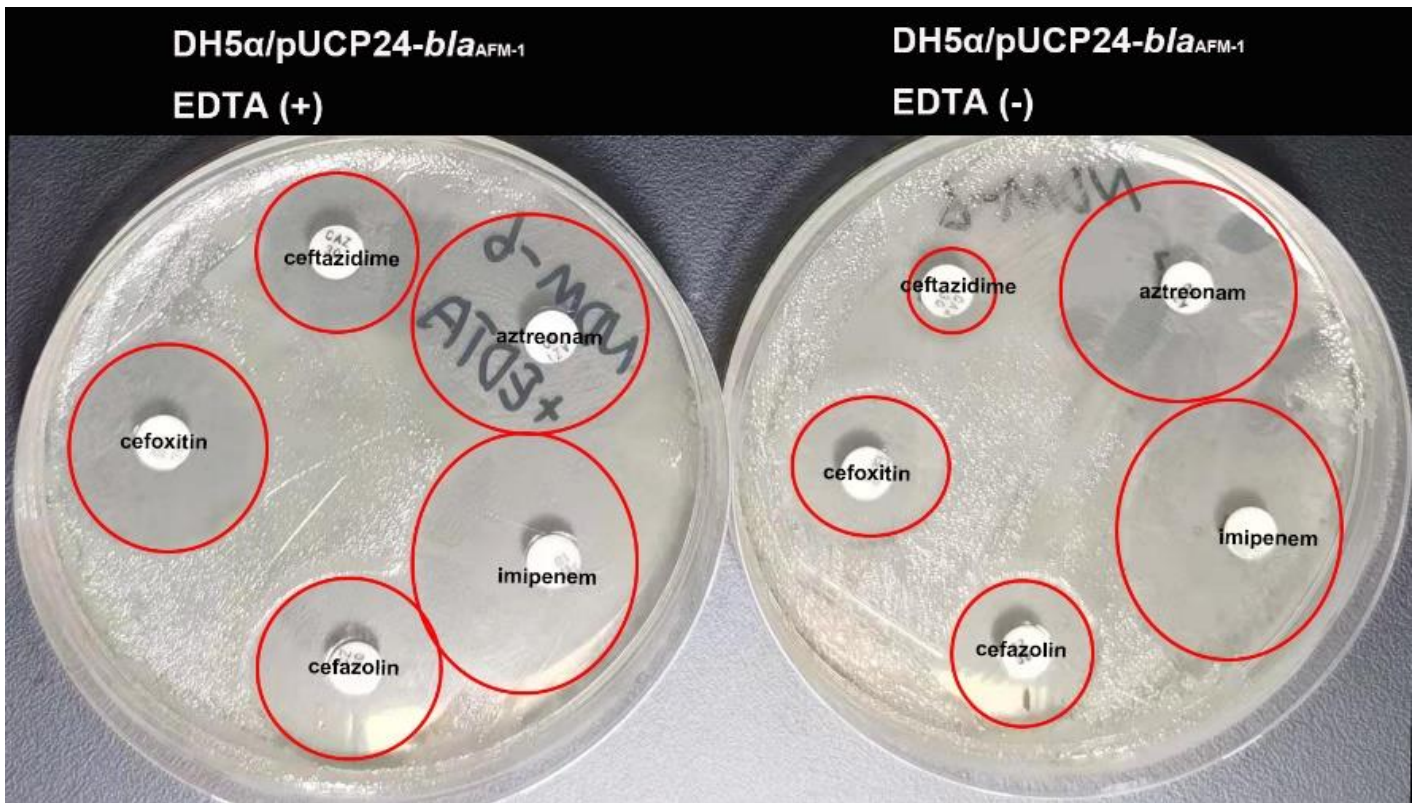

**Figure S1.** Antibiotic susceptibility testing by the disc diffusion method. *DH5α/pUCP24-bla<sub>AFM-1</sub>* incubated with or without 0.05 mmol/L EDTA.

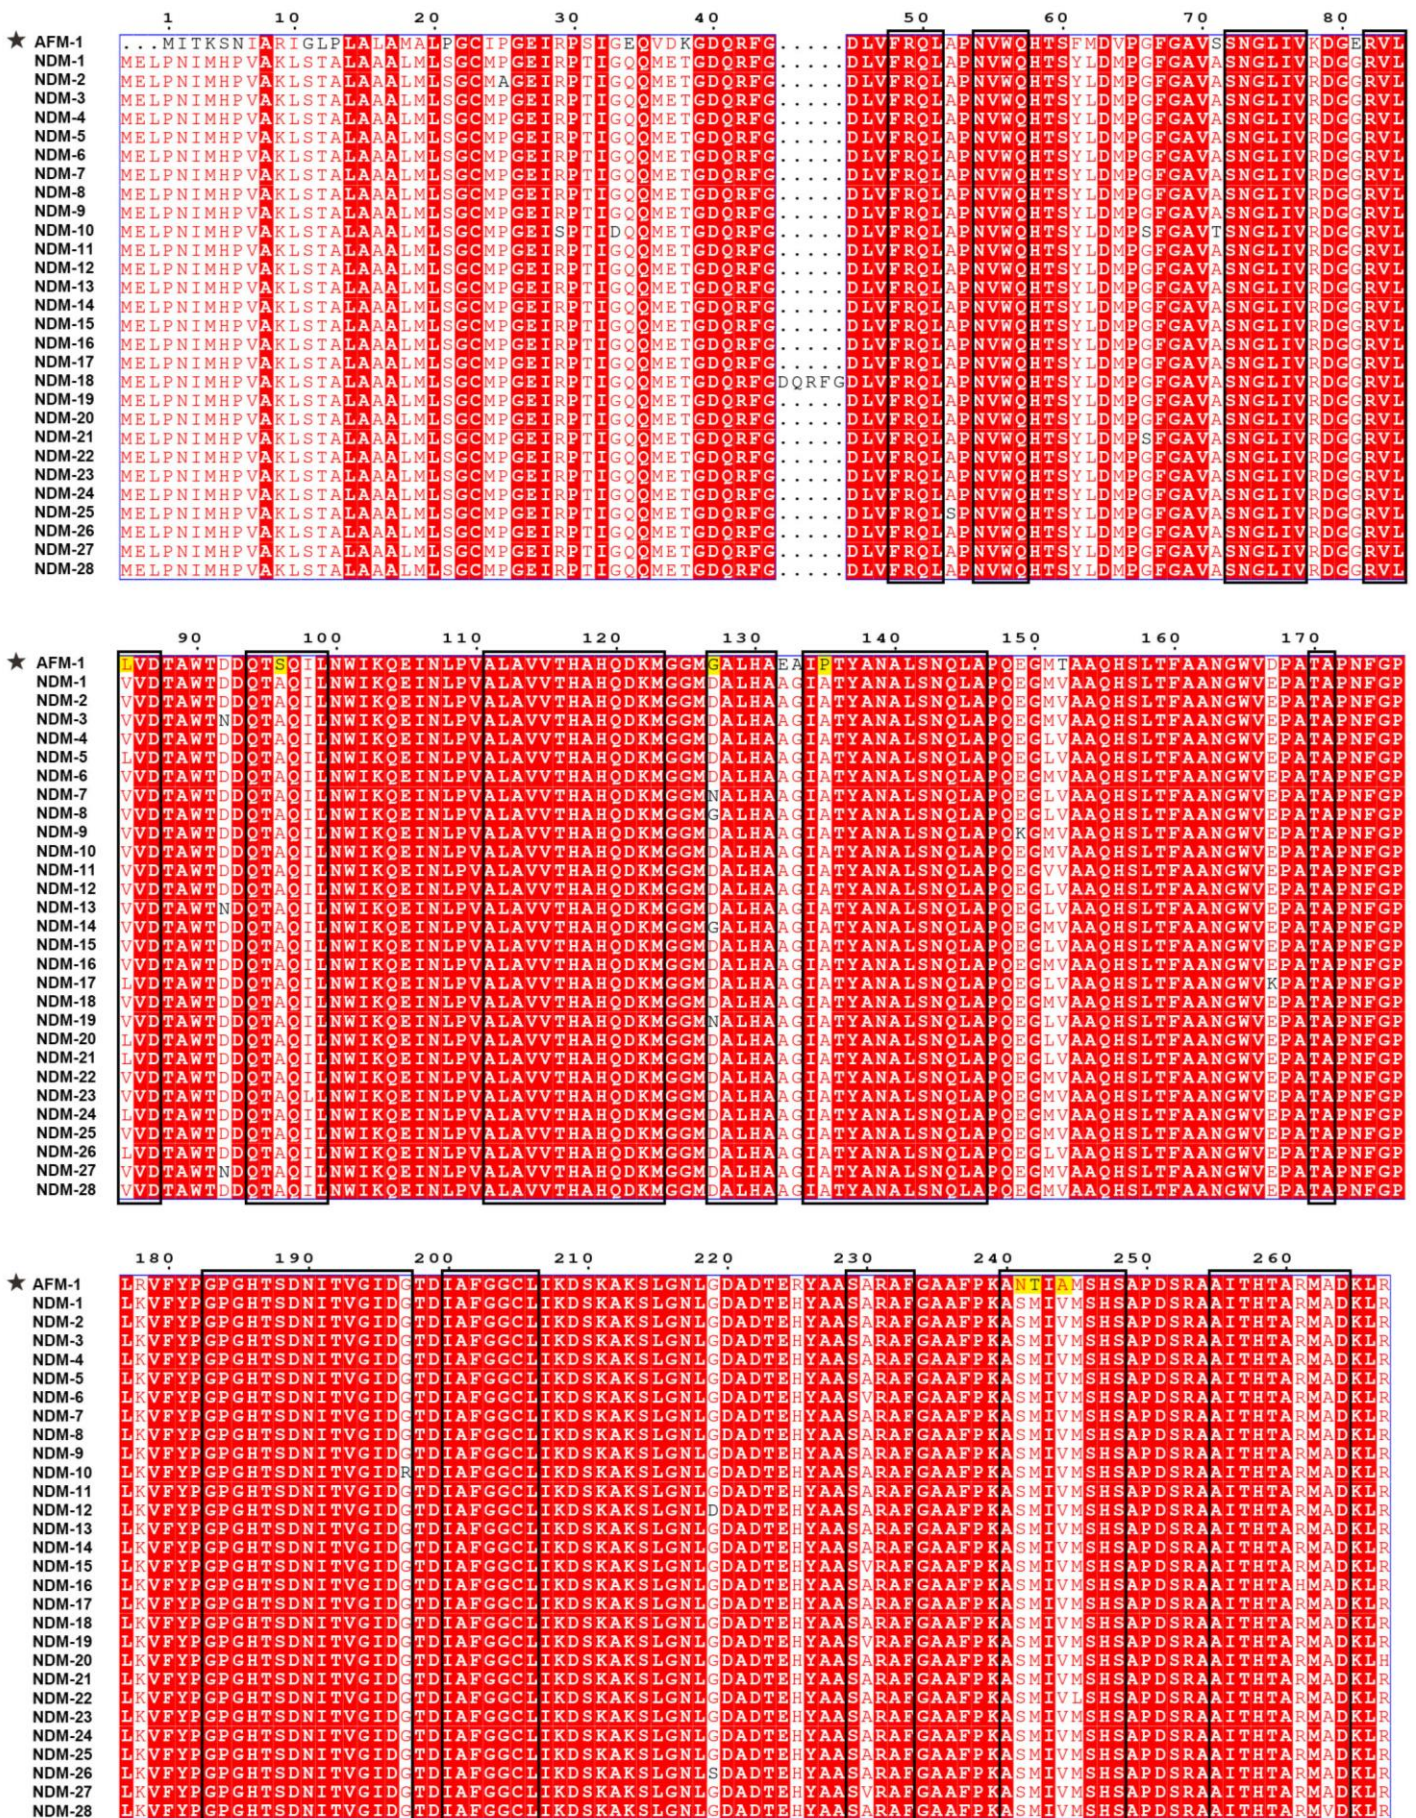

**Figure S2** Sequence alignment of New Delhi metallo-beta-lactamases. Residue numbers are positioned above the sequences according to AFM-1 numbers; 14 sequence fragments (F1-F14) of structurally conserved positions are boxed in black. Amino acid variants of AFM-1 in conserved sequence fragments are boxed in yellow.
